# Supplementary material for: The Functions of Mediator in Candida albicans Support a Role in Shaping Species-Specific Gene Expression
Source: PLoS Genet. 2012 Apr 5;8(4):e1002613. doi: 10.1371/journal.pgen.1002613 (PMC3320594; doi:10.1371/journal.pgen.1002613)
Supplement: Dataset S2 — Gene ontology and other functional analysis of the med31ΔΔ mutant transcriptome. (XLSX) [file pgen.1002613.s002.xlsx]

## Sheet: GO component up-regulated
GOID	GO_term	Cluster frequency	Background frequency	Corrected P-value	False discovery rate	Gene(s) annotated to the term	Directly Annotated GOID List
313	organellar ribosome	12 out of 186 genes, 6.5%	72 out of 6435 background genes, 1.1%	0.00011	0	orf19.1485:orf19.185:MRPL33:orf19.3205:MRP20:orf19.3480:orf19.3797:orf19.4204:orf19.4751:orf19.639.1:orf19.7012:MRPL37	5762:5763
5761	mitochondrial ribosome	12 out of 186 genes, 6.5%	72 out of 6435 background genes, 1.1%	0.00011	0	orf19.1485:orf19.185:MRPL33:orf19.3205:MRP20:orf19.3480:orf19.3797:orf19.4204:orf19.4751:orf19.639.1:orf19.7012:MRPL37	5762:5763
5739	mitochondrion	44 out of 186 genes, 23.7%	850 out of 6435 background genes, 13.2%	0.00818	0.0133	orf19.1195:ARC18:orf19.1300:orf19.1356:orf19.1485:ACS1:orf19.185:orf19.2201:RIM1:MRPL33:FAA21:SEN2:orf19.2754:MET13:CEK1:orf19.3205:MRP20:orf19.3480:COX15:orf19.3797:GCF1:orf19.4204:orf19.4358:orf19.439:CAT2:GDH3:orf19.4751:COX19:CYB2:orf19.5014:MET3:orf19.5459:orf19.5515:DLD1:orf19.5973:orf19.6100:AYR1:MAS2:orf19.639.1:orf19.6563.1:orf19.7012:REV3:OPI3:MRPL37	5758:5782:5783:5792:5777:5885:5886:43332:790:17087:214:32592:42645:42719:5811:5625:5634:5740:5741:5637:5743:5762:5844:5763:5739:16035:10494:5829
30446	hyphal cell wall	8 out of 186 genes, 4.3%	51 out of 6435 background genes, 0.8%	0.0127	0.01	SOD4:orf19.251:PST2:DDR48:CSH1:MET15:INO1:XYL2	30445:30446:9277:1950:5625:5737:9986:5829
44444	cytoplasmic part	81 out of 186 genes, 43.5%	1968 out of 6435 background genes, 30.6%	0.01437	0.008	orf19.1039:PEX11:orf19.1092:orf19.1195:ARC18:orf19.1210:orf19.1300:orf19.1356:RPB4:orf19.1485:orf19.1564:ACS1:orf19.185:orf19.2166:ARA1:orf19.2201:ARE2:CHS7:RIM1:MRPL33:orf19.2516:orf19.2629:FAA21:SEN2:orf19.2754:orf19.2761:MET13:CEK1:orf19.2887:orf19.3205:MRP20:HOC1:orf19.3480:COX15:orf19.3797:orf19.3926:TIP1:GCF1:VCX1:orf19.4204:TRR1:orf19.4358:orf19.439:CSH1:CAT2:orf19.4594:orf19.4633:GDH3:orf…	5782:30446:5783:5769:17119:5788:932:43332:5789:5968:790:1950:17087:214:32592:30125:42645:145:42719:5625:324:5840:12507:329:5737:9986:5576:5665:5844:5933:5739:16035:10494:5829:5773:5758:5774:5792:5777:5794:5778:5885:5886:220:221:30134:136:5811:138:8250:139:5634:5635:5740:31224:5741:16021:5637:30173:5743:5819:5762:5763
315	organellar large ribosomal subunit	7 out of 186 genes, 3.8%	40 out of 6435 background genes, 0.6%	0.01727	0.0067	orf19.1485:MRPL33:orf19.3205:MRP20:orf19.3797:orf19.639.1:MRPL37	5762
5762	mitochondrial large ribosomal subunit	7 out of 186 genes, 3.8%	40 out of 6435 background genes, 0.6%	0.01727	0.0057	orf19.1485:MRPL33:orf19.3205:MRP20:orf19.3797:orf19.639.1:MRPL37	5762
33279	ribosomal subunit	12 out of 186 genes, 6.5%	122 out of 6435 background genes, 1.9%	0.02659	0.0075	orf19.1485:orf19.185:MRPL33:orf19.3205:MRP20:orf19.3480:orf19.3797:orf19.4204:orf19.4751:orf19.639.1:orf19.7012:MRPL37	5762:5763
44429	mitochondrial part	25 out of 186 genes, 13.4%	436 out of 6435 background genes, 6.8%	0.09727	0.0244	orf19.1300:orf19.1485:orf19.185:RIM1:MRPL33:SEN2:orf19.2754:orf19.3205:MRP20:orf19.3480:COX15:orf19.3797:orf19.4204:orf19.4751:COX19:CYB2:orf19.5515:DLD1:orf19.5973:orf19.6100:AYR1:MAS2:orf19.639.1:orf19.7012:MRPL37	5783:17087:214:32592:42645:42719:5829:5758:5886:5811:5740:5741:5637:5743:5762:5763

## Sheet: GO process down-regulated
GOID	GO_term	Cluster frequency	Background frequency	Corrected P-value	False discovery rate	Gene(s) annotated to the term	Directly Annotated GOID List
30447	filamentous growth	41 out of 302 genes, 13.6%	430 out of 6514 background genes, 6.6%	0.00308	0	CPH2:MNT1:GPR1:PHHB:VPS28:DAC1:orf19.2397.3:PDE2:orf19.3228:FGR6-4:SHA3:GAL10:CAS5:PTC8:FGR6-3:YTM1:ROB1:FGR6-1:FKH2:FGR14:ALS1:SNQ2:TEC1:EFG1:CUP9:MHP1:orf19.6720:ECM29:FCR1:orf19.6868:orf19.6874:NRG1:RIM101:SSU1:ZCF37:DEF1:MAL2:HYM1:DCK1:DCK2:STP4	9272:44114:10106:20012:6043:44403:45787:6878:6046:43710:44406:9749:44409:6338:6623:90282:44011:902:45827:42273:10226:7109:51276:6057:44416:42493:10446:7329:6810:30260:1402:1403:7186:6491:6493:30447:19388:30448:45944:16337:7009:5987:90040:122:7118:304:16481:7155:6355:16485:15758:6357:1410:9405:45449:31505:920:9372:9268:19933:45595:7124:46688:6979:70417:7160:7163:6612:316:7165:43709:51834:6470:4886…
40007	growth	41 out of 302 genes, 13.6%	439 out of 6514 background genes, 6.7%	0.00514	0	CPH2:MNT1:GPR1:PHHB:VPS28:DAC1:orf19.2397.3:PDE2:orf19.3228:FGR6-4:SHA3:GAL10:CAS5:PTC8:FGR6-3:YTM1:ROB1:FGR6-1:FKH2:FGR14:ALS1:SNQ2:TEC1:EFG1:CUP9:MHP1:orf19.6720:ECM29:FCR1:orf19.6868:orf19.6874:NRG1:RIM101:SSU1:ZCF37:DEF1:MAL2:HYM1:DCK1:DCK2:STP4	9272:44114:10106:20012:6043:44403:45787:6878:6046:43710:44406:9749:44409:6338:6623:90282:44011:902:45827:42273:10226:7109:51276:6057:44416:42493:10446:7329:6810:30260:1402:1403:7186:6491:6493:19388:30447:30448:45944:7009:16337:5987:90040:122:7118:304:16481:7155:16485:6355:1410:6357:15758:9405:45449:31505:920:9372:9268:19933:45595:7124:46688:70417:6979:7160:7163:6612:316:7165:43709:51834:6470:4886…
42221	response to chemical stimulus	43 out of 302 genes, 14.2%	517 out of 6514 background genes, 7.9%	0.05163	0.0133	GAD1:CPH2:orf19.1253:orf19.1308:FCY21:UTP22:orf19.173:SOD5:VPS28:orf19.2175:OPT1:DIP5:PDE2:orf19.304:orf19.3228:orf19.341:SHA3:GAL10:orf19.4116:MIG1:HGT1:HOL4:CAS5:SFU1:TYE7:GAL4:orf19.5401:SNQ2:RRP6:TEC1:STP3:CDR1:LEU4:HSP104:orf19.6586:FCR1:YTH1:orf19.7029:NRG1:RIM101:ZCF37:PTP3:HYM1	46618:9272:750:9098:467:10106:20012:71040:8655:48545:71042:43065:51085:44403:71044:10039:6878:6879:44406:71049:9749:44409:973:6623:6378:45821:6379:44011:45827:34975:71051:10226:7109:44416:34473:42493:10446:34475:34476:7329:6810:1403:15856:19740:15893:19388:30447:30448:6855:6857:45944:42710:7009:43335:45117:122:7118:303:45332:304:70370:16481:7155:16485:15861:6355:1410:6357:15758:9405:6538:45732:45…

## Sheet: GO function down-regulated
GOID	GO_term	Cluster frequency	Background frequency	Corrected P-value	False discovery rate	Gene(s) annotated to the term	Directly Annotated GOID List
1071	nucleic acid binding transcription factor activity	18 out of 306 genes, 5.9%	135 out of 6514 background genes, 2.1%	0.00556	0	CPH2:orf19.173:orf19.2064:NDE1:MIG1:CAS5:SFU1:orf19.5026:GAL4:FKH2:TEC1:orf19.5953:EFG1:FCR1:NRG1:RIM101:SUC1:STP4	30528:16563:16564:3690:3700:43565:3677:3954:3704:17076
3700	sequence-specific DNA binding transcription factor activity	18 out of 306 genes, 5.9%	135 out of 6514 background genes, 2.1%	0.00556	0	CPH2:orf19.173:orf19.2064:NDE1:MIG1:CAS5:SFU1:orf19.5026:GAL4:FKH2:TEC1:orf19.5953:EFG1:FCR1:NRG1:RIM101:SUC1:STP4	30528:16563:16564:3690:3700:43565:3677:3704:3954:17076
3704	specific RNA polymerase II transcription factor activity	7 out of 306 genes, 2.3%	26 out of 6514 background genes, 0.4%	0.01528	0.0333	HAL9:FKH2:TEC1:STP3:NRG1:RIM101:AHR1	5515:16563:16564:3690:3700:43565:3677:3704

## Sheet: Repressed cell wall functions
Cell wall proteins		Cell wall functions
ALS1/Als family	cell wall adhesin	ECM18	S. cerevisiae homolog has a role in cell wall organization
SCW11	cell wall protein regulated by Ace2	MNN22	Similar to Golgi alpha 1,2 mannosyltransferase
PGA26	putative GPI anchored protein, induced during cell wall regeneration	CHT3	Chtinase, Ace2 regulated
RHD3/Pga30-like family	GPI anchored cell wall protein	RHD1/beta mannosyltransferase family	Putative beta-mannosyltransferase, required for the addition of beta-mannose to the acid-labile fraction of cell wall phosphopeptidomannan
PIR1	Cell wall protein	ENG1	Endoglucanase, Ace2 regulated
SOD5	Superoxide dismutase, found in the cell wall	CAS5	Transcription factor required for cell wall integrity
PGA13	putative GPI anchored protein, induced during cell wall regeneration	GSL1	Subunit of beta-1,3-glucan synthase
HYR3	putative GPI anchored protein of unknown function	HYM1	Protein of the RAM cell wall integrity signalling network; has a role in cell separation and hyphal growth
EAP1	Cell wall adhesin	MNT1	Alpha-1,2-mannosyl transferase, cell wall mannoprotein biosynthesis
ALS5/Als family	Cell wall adhesin	ECM21	Similar to S. cerevisiae Ecm21p (possible cell wall role);
ALS6/Als family	Cell wall adhesin	CHT1	chitinase
IFF6/HYR10	putative GPI anchored protein of unknown function
PGA38	Putative GPI-anchored protein of unknown function; repressed during cell wall regeneration
Cell separation
CHT3
CHT1
ENG1
SCW11
HYM1

## Sheet: Up-regulated wall functions
Cell wall and GPI anchored proteins
MNN4-4	mannosyltransferase
RBT4	putative cell surface protein
orf19.251	ThiJ/PfpI protein; antigenic
ECM331	GPI-anchored protein; mainly at plasma membrane, also at cell wall
PGA23	Putative GPI-anchored protein of unknown function, cell surface
orf19.7214	Similar to glucan 1,3-beta-glucosidase
PGA1	Putative GPI-anchored protein; induced during cell wall regeneration; required for normal adhesion to host cells and for adherence during biofilm formation
EXG2	GPI-anchored cell wall protein, similar to S. cerevisiae exo-1,3-beta-glucosidase Exg2p
HOC1	Protein with similarity to mannosyltransferases
orf19.6484/LDG4	GPI family Pga30-like putative cell wall proteins
LDG3	GPI family Pga30-like putative cell wall proteins
PGA31	GPI family Pga30-like, Cell wall protein; putative GPI anchor
CIS2	Putative role in regulation of biogenesis of the cell wall;
CWH41	Processing alpha glucosidase I, involved in N-linked protein glycosylation and assembly of cell wall beta 1,6 glucan
CHS7	required for wild type chitin synthase activity
orf19.5070	Similar to cell-wall mannoproteins

## Sheet: FGR6 family
FGR6 family
orf19.1800	FGR6-related genes in the RB2 repeat sequence
orf19.4712	FGR6-3
orf19.727	FGR6-related genes in the RB2 repeat sequence
orf19.3490	FGR6-4
orf19.5191	FGR6-1
orf19.5775	FGR6-related genes in the RB2 repeat sequence

## Sheet: Oligopeptide transporter family
Oligopeptide transporter family, Down-regulated genes
OPT4
OPT1
IFC3

## Sheet: OTHER functions down-regulated
Plasma membrane, Transporters			Metabolism			Transposition
SHA3	Kinase, glucose transport		GAL10	UDP-glucose 4-epimerase, Galactose utilization		orf19.2669	ORF in retrotransposon Tca4
HGT1	Glucose transporter		PCK1	Phosphoenolpyruvate carboxykinase; role in gluconeogenesis		orf19.6469	ORF in retrotransposon Tca11
ERG251	Ergosterol biosynthesis		GAL1	Galaktokinase, galactose utilization		FGR14 (orf19.559)	Retrotransposon Zorro
GPR1	Glucose sensor		GAL7	Putative galactose-1-phoshphate uridyl transferase
CDR1	ABC transporter, drug resistance		MAE1	Malate dehydrogenase
orf19.1855	Predicted membrane transporter, member of the anion:cation symporter (ACS) family, major facilitator superfamily (MFS)		GDH2	Glutamate dehydrogenase
orf19.6522	Putative allantoate permease;		LEU4	Putative 2-isopropylmalalate synthase, Leucin biosynthesis
DIP5	amino acid transporter		GCV2	Glycine metabolism
CAN3	amino acid transporter		SNZ1	vitamin B6 synthesis
ENA2	sodium transporter		orf19.3810	homolog of Methylene Tetrahydrafolate Dehydrogenase
SSU1	sulfite transport		STF2	ATP biosynthesis
orf19.5022	S. cerevisiae ortholog SMF2 has di-, tri-valent inorganic cation transmembrane transporter activity and has role in manganese ion transport, cellular cobalt ion homeostasis, cobalt ion transport, cellular manganese ion homeostasis (		SNO1	histidine biosynthesis
SMF12	Manganese transporter		GAD1	Glutamate decarboxylase
GNP1	amino acid transporter		orf19.2308	GLYCOLYSIS, PFK26 homolog, 6-phosphofructo-2-kinase
FCY21	plasma membrane transporter hypoxanthine-adenine-guanine-cytosine/ H+ symporter;		ARO10	Aromatic decarboxylase of the Ehrlich fusel oil pathway of aromatic alcohol biosynthesis
GIT2	Putative glycerophosphoinositol permease		POT1-2	peroxisomal fatty acid oxidation enzyme
SNQ2	membrane transporter ABC		orf19.5838	Phosphoserine phosphatase of the phosphoglycerate pathway, involved in serine and glycine biosynthesis,
HOL4	Protein described as an ion transporter		MAL2	SUCROSE UTLISATION, Alpha-glucosidase that hydrolyzes sucrose;
orf19.341	TPO3 homolog, spermidine transporter		SHM2	glycine metabolsim
AGP2	amino acid permease		AYR2	phosphatidic acid biosynthesis
			ADE2	adenine biosynthesis
			DTD2	S. cerevisiae ortholog DTD1 has D-tyrosyl-tRNA(Tyr) deacylase activity, has role in D-amino acid catabolic process
			AAT1	Asparagine biosynthesis, Putative aspartate aminotransferase
			ADE5,7	adenine biosynthesis
			ADE1	adenine biosynthesis
			URA2	aspartate carbamoyltransferase
			ARG3	METABOLISM, Ornithine carbamoyltransferase, ARG biosynthesis

## Sheet: OTHER functions up-regulated
Metabolism					Oxidative stress				Transporters		Transposition
GLK1	Glucokinase, Trehalose utilization				orf19.3461	OX STRESS INDUCED, oxidoreductase			VCX1	transporter	POL93	Retrotransposon Tca8
GLK4	Glucokinase, Trehalose utilization				orf19.251	OX STRESS INDUCED, oxidoreductase			HGT3	transporter	HRT2	Protein with role in Ty3 transposition
XYL2	xylose degradation,				SOD4	OX STRESS			HXT5	transporter	ESC4	S. cerevisiae homolog repressess transposition
					PST2	OX STRESS INDUCED, oxidoreductase
MET3	sulfate assimilation				orf19.2165	OX STRESS INDUCED
MET14	sulfur metabolism				IFR2	OX STRESS REGULATED
MET13	sulfate assimilation				AYR1	OX STRESS, putative oxidoreductase, induced upon interaction with macrophages
MET15	sulfate assmiliation				TRR1	OX STRESS induced, thioredoxin reductase
					DOT5	OX STRESS induced, thioredoxin peroxidase, nuclear
ACS1	acetyl-CoA synthase				orf19.5239	OX STRESS INDUCED
CAT2	carnitine transferase, acetyl-coA transport
orf19.6100	Homolog of Crd1 (cardiolipin synthase)
OPI3	Putative phosphatidylethanolamine N-methyltransferase of phosphatidylcholine biosynthesis
FAA21	fatty acid oxidation
PEX11	fatty acid oxidation
PYC2	pyruvate carboxylase, TCA cycle, glycolysis, gluconeogenesis, converts pyruvate to oxaloacetate
COX15	HEME biosynthesis, cytochrome C oxidase
MDH1-3	malate dehydrogenase
DLD1	mitochondrial methylglyoxal pathway
TRP1	tryptophane biosynthesis
CDC21	Thymidilate synthase
orf19.7522	predicted NAD synthesis from tryptophane
GDH3	NADP-glutamate dehydrogenase
ARA1	D-Arabinose dehydrogenase
DAO1	Putative amino acid oxidase
